# Supplementary material for: Maternal Diet Influences Fetal Growth but Not Fetal Kidney Volume in an Australian Indigenous Pregnancy Cohort
Source: PubMed Central journal article supplement (PMC7914647; doi:10.3390/nu13020569), 2021-02-09
Supplement: nutrients-13-00569-s001.pdf [file nutrients-13-00569-s001.pdf]

Supplementary

# Maternal Diet Influences Fetal Growth but Not Fetal Kidney Volume in an Australian Indigenous Pregnancy Cohort

Yu Qi Lee <sup>1</sup>, Eugenie R Lumbers <sup>2,3</sup>, Tracy L Schumacher <sup>4,5,6</sup>, Clare E Collins <sup>4,7</sup>, Kym M Rae <sup>8,9</sup>, Kirsty G Pringle <sup>2,3,\*</sup> and Gomeri gaaynggal Advisory Committee

**Table S1.** Association between maternal dietary intake and fetal and birth weight.

|                 | EFW (g) <sup>1</sup> |             |             | Birth Weight (g) <sup>2</sup> |             |             |
|-----------------|----------------------|-------------|-------------|-------------------------------|-------------|-------------|
|                 | n                    | Coefficient | 95% CI      | n                             | Coefficient | 95% CI      |
| Micronutrients  |                      |             |             |                               |             |             |
| Thiamin (mg)    | 96                   | 10.9        | -70.8, 92.5 | 96                            | 51.2        | -113, 215   |
| Riboflavin (mg) | 96                   | -13.6       | -68.3, 41.2 | 96                            | 14.7        | -96.9, 126  |
| Niacin eq (mg)  | 96                   | -2.53       | -8.73, 3.67 | 96                            | -1.01       | -13.7, 11.7 |
| Vitamin C (mg)  | 96                   | -0.18       | -0.63, 0.27 | 96                            | -0.04       | -0.97, 0.9  |
| Magnesium (mg)  | 96                   | -0.07       | -0.54, 0.4  | 96                            | 0.1         | -0.85, 1.05 |
| Phosphorus (mg) | 96                   | -0.02       | -0.11, 0.07 | 96                            | 0.02        | -0.16, 0.2  |
| Macronutrients  |                      |             |             |                               |             |             |
| Total Fat (g)   | 96                   | -0.59       | -1.98, 0.79 | 96                            | -0.28       | -3.1, 2.55  |
| Sat Fat (g)     | 96                   | -1.12       | -4.07, 1.83 | 96                            | -0.1        | -6.13, 5.92 |

EFW: estimated fetal weight. CI: confidence interval.

<sup>1</sup> Adjusted for smoking, gestational age in days (at ultrasound), Pre-pregnancy Body Mass Index.

<sup>2</sup> Adjusted for smoking, gestational age in days (at delivery), Pre-pregnancy Body Mass Index.

**Table S2.** Association between maternal dietary intake and fetal kidney volume in the 3<sup>rd</sup> trimester.

|                 | Combined kidney volume (cm <sup>3</sup> ) <sup>1</sup> |             |               | Combined kidney volume: EFW (cm <sup>3</sup> /kg) <sup>2</sup> |             |               |
|-----------------|--------------------------------------------------------|-------------|---------------|----------------------------------------------------------------|-------------|---------------|
|                 | n                                                      | Coefficient | 95% CI        | n                                                              | Coefficient | 95% CI        |
| Micronutrients  |                                                        |             |               |                                                                |             |               |
| Thiamin (mg)    | 97                                                     | -0.57       | -2.0, 0.86    | 97                                                             | -0.08       | -0.7, 0.56    |
| Riboflavin (mg) | 97                                                     | -0.56       | -1.53, 0.41   | 97                                                             | -0.2        | -0.63, 0.23   |
| Niacin eq (mg)  | 97                                                     | -0.02       | -0.08, 0.04   | 97                                                             | -0.01       | -0.06, 0.04   |
| Vitamin C (mg)  | 97                                                     | 0.002       | -0.01, 0.01   | 97                                                             | 0.002       | -0.002, 0.005 |
| Magnesium (mg)  | 97                                                     | -0.004      | -0.01, 0.004  | 97                                                             | -0.001      | -0.005, 0.002 |
| Phosphorus (mg) | 97                                                     | -0.001      | -0.002, 0.001 | 97                                                             | -0.0002     | -0.001, 0.001 |
| Macronutrients  |                                                        |             |               |                                                                |             |               |
| Total Fat (g)   | 97                                                     | -0.01       | -0.03, 0.01   | 97                                                             | -0.003      | -0.01, 0.01   |
| Sat Fat (g)     | 97                                                     | -0.02       | -0.07, 0.03   | 97                                                             | -0.01       | -0.03, 0.02   |

EFW: estimated fetal weight. CI: confidence interval.

<sup>1</sup> Adjusted for EFW (kg) and smoking.

<sup>2</sup> Adjusted for smoking.
